# Supplementary material for: Antimetastatic Effect of Fucoidan-Sargassum against Liver Cancer Cell Invadopodia Formation via Targeting Integrin αVβ3 and Mediating αVβ3/Src/E2F1 Signaling
Source: PubMed Central journal article supplement (PMC6775528; doi:10.7150/jca.26740), 2019-08-27

**Supplementary figure 1.** The potential of Fucoïdan-Sargassum to be integrated into hepatocellular carcinoma treatment regimens. (A) The images show that Fucoïdan-Sargassum markedly increased apoptotic bodies in a dose-dependent manner, compared to the control cells. (B) Fucoïdan-Sargassum inhibited pro-metastatic target genes and proteins. (C) Fucoïdan-Sargassum activated HDAC6, which is related to autophagic cell death during hepatocarcinogenesis.

**A**

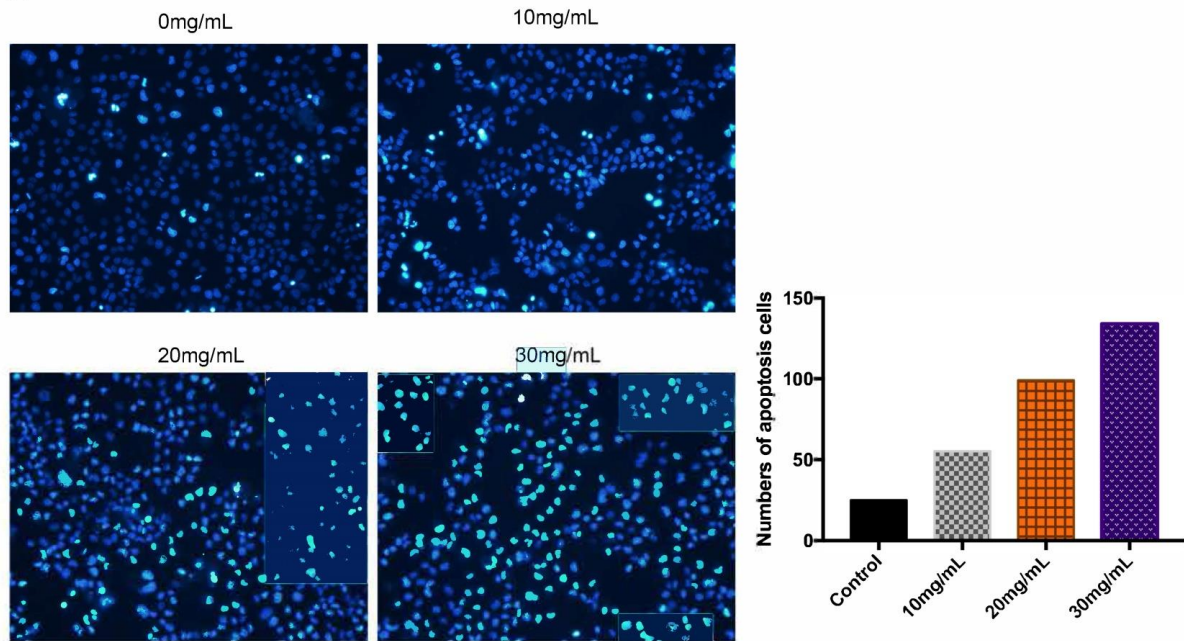

**B**

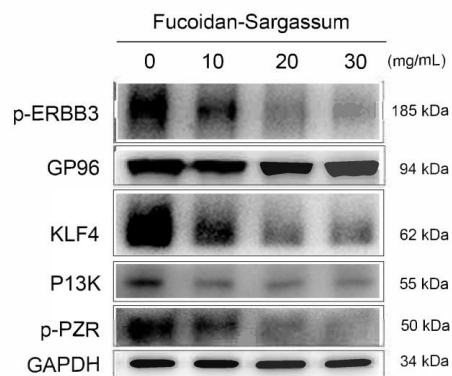

**C**

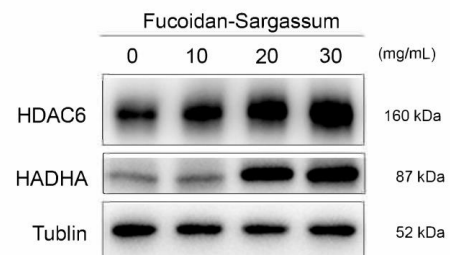

Supplement: jcav10p4777s1.pdf [file jcav10p4777s1.pdf]
